# Supplementary material
Source: PubMed Central journal article supplement (PMC3784998)
Supplement: NIHMS509074-supplement-supplement_1.pdf [file NIHMS509074-supplement-supplement_1.pdf]

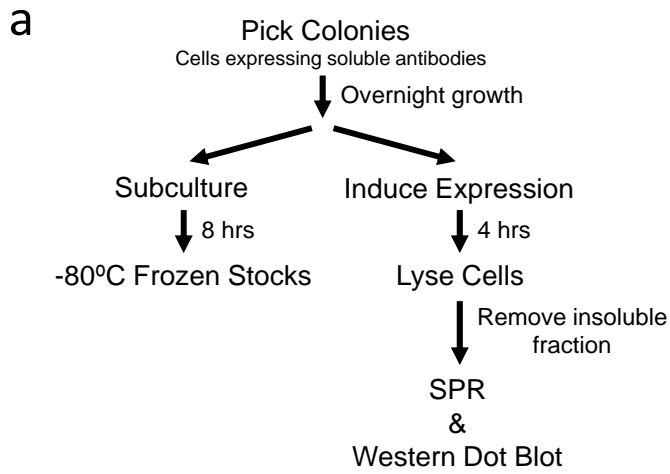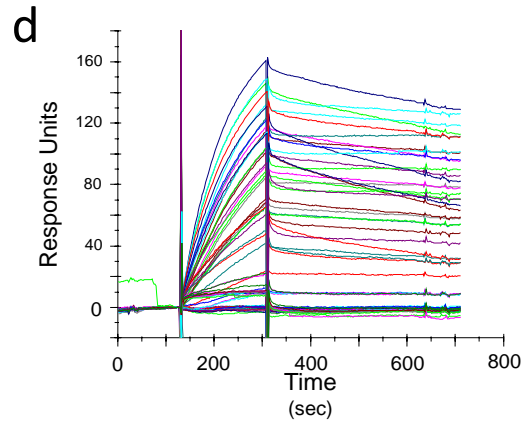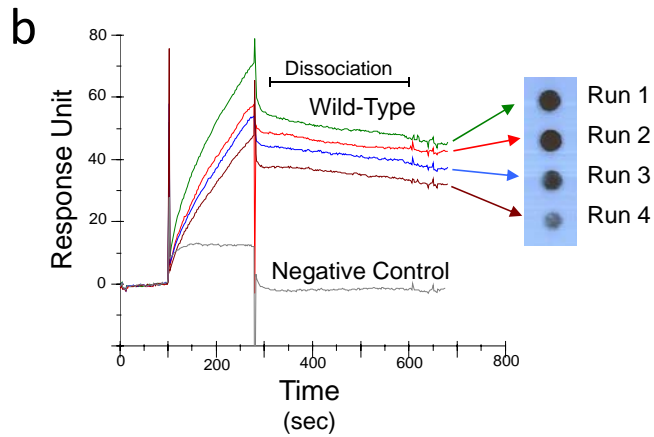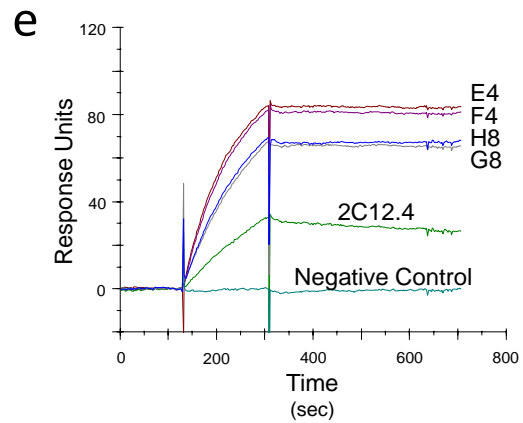

**c**

| Wild-Type | $k_{off}$<br>( $s^{-1}$ ) | $k_{off}$ Relative<br>to Purified |
|-----------|---------------------------|-----------------------------------|
| Purified  | $3.2 \times 10^{-4}$      | 1.0                               |
| Run 1     | $3.3 \times 10^{-4}$      | 1.0                               |
| Run 2     | $3.9 \times 10^{-4}$      | 1.2                               |
| Run 3     | $4.0 \times 10^{-4}$      | 1.3                               |
| Run 4     | $4.1 \times 10^{-4}$      | 1.3                               |

**f**

| Antibody | $k_{off}$<br>( $s^{-1}$ ) | Relative<br>$k_{off}$ |
|----------|---------------------------|-----------------------|
| 2C12.4   | $3.9 \times 10^{-4}$      | 1                     |
| G8       | $2.8 \times 10^{-5}$      | 14                    |
| F4       | $3.5 \times 10^{-5}$      | 11                    |
| E4       | $2.7 \times 10^{-5}$      | 20                    |
| H8       | $< 5 \times 10^{-6}$      | >75                   |
